# Supplementary material for: Utilizing electronic effects in the modulation of BTPhen ligands with respect to the partitioning of minor actinides from lanthanides
Source: Royal Society of Chemistry journal article supplement (doi:10.1039/c3cc45126g), 2013-01-01
Supplement: c3cc45126g.pdf [file c3cc45126g.pdf]

---

# Utilizing Electronic Effects in the Modulation of BTPhen Ligands with Respect to the Partitioning of Minor Actinides from Lanthanides

*Ashfaq Afsar,<sup>a</sup> Dominic L. Laventine,<sup>a</sup> Laurence M. Harwood,<sup>\*a</sup> Michael J.  
Hudson<sup>a</sup> and Andreas Geist<sup>b</sup>*

---

## Table of contents

|            |                                                           |            |
|------------|-----------------------------------------------------------|------------|
| <b>1.0</b> | <b>Experimental Procedures</b>                            | <b>S2</b>  |
| <b>2.0</b> | <b>NMR Spectroscopic Titrations with Lanthanide Salts</b> | <b>S12</b> |
| <b>3.0</b> | <b>Solvent Extraction Properties</b>                      | <b>S12</b> |

## 1.0 Experimental Procedures

### General procedure

NMR spectra were recorded using either a Bruker AMX400 or an Avance DFX400 instrument. Deuterated chloroform ( $\text{CDCl}_3$ ) and Deuterated DMSO (dimethyl sulfoxide- $d_6$ ) were used as solvents. Chemical shifts ( $\delta$  values) were reported in parts per million (ppm) with the abbreviations s, d, t, q, qn, sx, dd, ddd and br denoting singlet, doublet, triplet, quartet, quintet, sextet, double doublets, doublet of doublets of doublets and broad resonances respectively. Coupling constants ( $J$ ) are quoted in Hertz.

IR spectra were recorded as Nujol<sup>®</sup> mulls (N) on a Perkin Elmer RX1 FT-IR instrument.

All the melting points were determined on a Gallenkamp melting point apparatus.

Mass spectra ( $m/z$ ) were recorded under conditions of electrospray ionisation (ESI). The ions observed were quasimolecular ions created by the addition of a hydrogen ion denoted as  $[\text{MH}]^+$  or of sodium ion,  $[\text{M} + \text{Na}]$ . The instrument used was Xcalibur Tune 2.1 (SP1).

### 2,9-Bis(5,6-dipentyl-1,2,4-triazin-3-yl)-1,10-phenanthroline (**7a**)

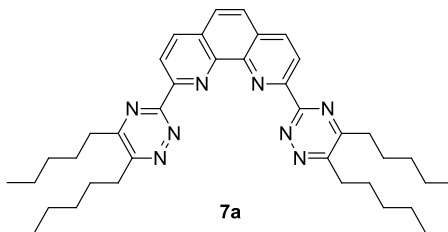

To a suspension of **6a** (0.50 g, 1.7 mmol) in THF (50 mL) was added dodecane-6,7-dione (0.76 g, 3.8 mmol, 2.2 eq).  $\text{Et}_3\text{N}$  (3 mL, 21.3 mmol) was added and the mixture was heated under reflux for 3 days. After allowing the solution to cool to room temperature, the solvent was evaporated and the remaining semi-solid residue was triturated with ice-cold  $\text{Et}_2\text{O}$  (100 mL). The insoluble solid was filtered and washed with further ice-cold  $\text{Et}_2\text{O}$  (100 mL) and allowed to dry in air to afford the ligand **7a** as a yellow solid (0.27 g, 25 %); Mp (138-141°C);  $^1\text{H}$  NMR ( $\text{CDCl}_3$ ):  $\delta_{\text{H}} = 0.94$  (m, 12H), 1.45 (m, 16H), 1.90 (m, 8H), 3.11 (m, 8H), 7.96 (s, 2H), 8.45 (d,  $J = 8.3$  Hz, 2H), 8.93 (d,  $J = 8.3$  Hz, 2H);  $^{13}\text{C}$  NMR ( $\text{CDCl}_3$ )  $\delta_{\text{C}} = 14, 14.1, 22.5,$

22.5, 28.2, 28.3, 31.7, 32.1, 32.4, 34.4, 123.1, 127.5, 129.7, 137.2, 146.6, 153.6, 160, 161.6, 162.6;  $C_{76}H_{100}N_{16}$  [2M + Na] requires  $m/z$  1259.8209; (FTMS + c ESI) MS found  $m/z$  1259.8235; IR  $\nu_{max}$  /  $cm^{-1}$  = 3511, 2956, 2926, 2858, 2674, 2490, 1622, 1585, 1518, 1496, 1466, 1441.

### 5-Bromo-2,9-dimethyl-1,10-phenanthroline (**2**)

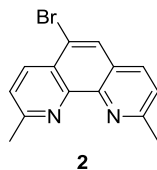

Fuming sulfuric acid (75 mL) was added to 2,9-dimethyl-1,10-phenanthroline **51** (5.11 g, 24.5 mmol). Bromine (0.76 mL, 14.7 mmol, 0.6 eq) was added and the mixture was heated under reflux overnight. The flask was allowed to cool to room temperature and the solution was quenched with water (200 mL). NaOH pellets were added until the pH of the solution was between 7-8. The resulting mixture was extracted with chloroform (2×200 mL) and the combined organic phases were dried over  $MgSO_4$ , filtered and the solvent removed under vacuum to afford the product **151** as a yellow solid (6.51 g, 93 %); Mp (175-178°C);  $^1H$ -NMR ( $CDCl_3$ ):  $\delta_H$  = 2.94 (s, 3H), 2.98 (s, 3H), 7.50 (d,  $J$  = 8.2 Hz, 1H), 7.58 (d,  $J$  = 8.2 Hz, 1H), 8.03 (s, 1H), 8.04 (d,  $J$  = 8.2 Hz, 1H), 8.53 (d,  $J$  = 8.2 Hz, 1H);  $^{13}C$  NMR ( $CDCl_3$ )  $\delta_C$  = 25.7, 26.0, 119.7, 124.1, 124.3, 126.0, 127.1, 128.6, 135.4, 136.1, 144.8, 145.8, 160.0, 160.3;  $C_{14}H_{11}N_2Br_1$  [MH] $^+$  requires  $m/z$  287.0178; (FTMS + p ESI) MS found  $m/z$  287.0180; IR  $\nu_{max}$  /  $cm^{-1}$  = 3385, 3048, 2916, 2163, 1603, 1589, 1546, 1491, 1435, 1400.

### 5-Bromo-1,10-phenanthroline-2,9-dicarbaldehyde (**4b**)

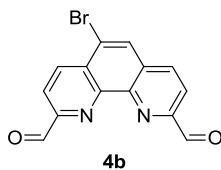

Selenium dioxide (12.34 g, 111.2 mmol, 2.1 eq) dissolved in 1,4-dioxane (250 mL) and water (~ 7mL) was heated to reflux. To this solution was added a solution of **2** (15.08 g, 52.5 mmol) in dioxane (250 mL) dropwise over 30 min. The solution was heated under reflux for 2.5 h.

After allowing the solution to cool to room temperature, the precipitated selenium metal was filtered off. The filtrate was evaporated and the solid was triturated with Et<sub>2</sub>O (200 mL). The insoluble solid was filtered, washed with Et<sub>2</sub>O (200 mL) and allowed to dry in vacuum oven (40 °C) to afford the product **4b** as a dark brown solid (14.94 g, 90 %); Mp (207-210°C); <sup>1</sup>H-NMR (DMSO-*d*<sub>6</sub>): δ<sub>H</sub> = 8.30 (d, *J* = 8.3 Hz, 1H), 8.40 (d, *J* = 8.5 Hz, 1H), 8.70 (d, *J* = 8.3 Hz, 1H), 8.75 (s, 1H), 8.90 (d, *J* = 8.5 Hz, 1H), 10.33 (s, 1H, CHO), 10.37 (s, 1H, CHO); <sup>13</sup>C NMR (DMSO-*d*<sub>6</sub>) δ<sub>C</sub> = 120.7, 121.1, 122.4, 129.9, 131.7, 132.3, 137.7, 137.7, 144.5, 145.5, 152.4, 152.4, 193.1, 193.4; C<sub>14</sub>H<sub>7</sub>N<sub>2</sub>O<sub>2</sub>Br [MH]<sup>+</sup> requires *m/z* 314.9764 and 316.9743; (FTMS + p ESI) MS found *m/z* 314.9764 and 316.9743; IR *v*<sub>max</sub> / cm<sup>-1</sup> = 3068, 2856, 2191, 1973, 1697, 1598, 1548, 1351, 1237.

### 5-Bromo-1,10-phenanthroline-2,9-dicarbonitrile (**5b**)

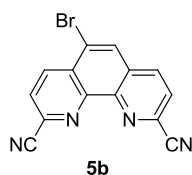

To a suspension of **4b** (11.33 g, 36 mmol) in dry MeCN (500 mL) was added hydroxylamine hydrochloride (5.80 g, 83.4 mmol, 2.3 eq) and Et<sub>3</sub>N (33.1 mL, 235.5 mmol, 6.5 eq). The solution was heated under reflux for 4 h. After allowing the mixture to cool to room temperature, *p*-toluenesulfonylchloride (22.67 g, 118.9 mmol, 3.3 eq) and pyridine (18 mL, 223.5 mmol, 6.2 eq) were added and the mixture was heated under reflux for 24 h. The mixture was filtered while hot and the solid residue was washed with hot MeCN (40 mL). The filtrate was evaporated to afford a brown semi-solid which was triturated with MeOH (200 mL) and then filtered and washed with MeOH (200 mL) and Et<sub>2</sub>O (200 mL) to afford the product **5b** as a brown solid (7.19 g, 65 %); Mp (151-154°C); <sup>1</sup>H NMR (DMSO-*d*<sub>6</sub>) δ<sub>H</sub> = 8.39 (d, *J* = 8.3 Hz, 1H), 8.47 (d, *J* = 8.5 Hz, 1H), 8.70 (s, 1H), 8.73 (d, *J* = 8.3 Hz, 1H), 8.82 (d, *J* = 8.5 Hz, 1H); <sup>13</sup>C NMR (DMSO-*d*<sub>6</sub>) δ<sub>C</sub> = 117, 117.4, 122.3, 126.8, 129.1, 130.4, 132.3, 133.1, 133.4, 137.8, 137.8, 143, 144.9, 145.5; C<sub>14</sub>H<sub>5</sub>N<sub>4</sub>Br [MH]<sup>+</sup> requires *m/z* 308.9770 and 310.9750; (FTMS + p ESI) MS found *m/z* 308.9773 and 310.9751; IR *v*<sub>max</sub> / cm<sup>-1</sup> = 3082, 2984, 2238, 1616, 1497, 1366.

### 5-Bromo-1,10-phenanthroline-2,9-dicarbohydrazonamide (**6b**)

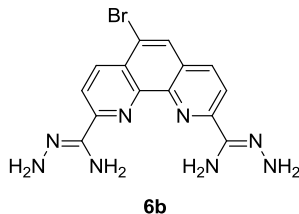

To a suspension of **5b** (2.50 g, 8.1 mmol) in EtOH (50 mL) was added hydrazine hydrate (50 mL, 64%). The suspension was stirred at room temperature for 2 days. Et<sub>2</sub>O (50 mL) and MeOH (50 mL) were added and the solid was filtered and washed with Et<sub>2</sub>O (200 mL) and allowed to dry in a vacuum oven (40 °C) to afford the product **6b** as a brown solid (2.10 g, 70 %); Mp (above 335°C); <sup>1</sup>H NMR (DMSO-*d*<sub>6</sub>) δ<sub>H</sub> = 5.86 (br s, 4H, NH<sub>2</sub>), 6.15 (br s, 4H, NH<sub>2</sub>), 8.31 (d, *J* = 8.3 Hz, 1H), 8.37 (d, *J* = 8.5 Hz, 1H), 8.41 (d, *J* = 8.3 Hz, 1H), 8.43 (s, 1H), 8.54 (d, *J* = 8.5 Hz, 1H); <sup>13</sup>C NMR (DMSO-*d*<sub>6</sub>) δ<sub>C</sub> = 119.1, 119.7, 120.1, 126.7, 128.4, 129.2, 135.1, 135.3, 142.7, 143, 143.2, 144.2, 151.7, 151.9; C<sub>14</sub>H<sub>13</sub>N<sub>8</sub>Br [MH]<sup>+</sup> requires *m/z* 373.0519 and 375.0499; (FTMS + c ESI) MS found *m/z* 373.0519 and 375.0499; IR ν<sub>max</sub> / cm<sup>-1</sup> = 3450, 3339, 3188, 2922, 2853, 1634, 1601, 1581, 1544, 1490, 1448, 1403.

### 5-Bromo-2,9-bis(5,6-dipentyl-1,2,4-triazin-3-yl)-1,10-phenanthroline (**7b**)

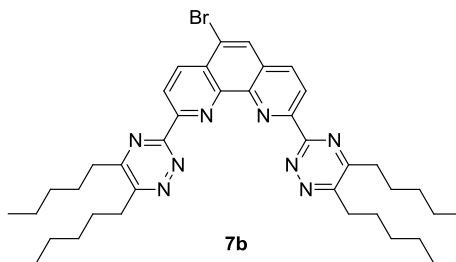

To a suspension of **6b** (0.50 g, 1.3 mmol) in 1,4-dioxane (75 mL) was added dodecane-6,7-dione (0.61 g, 3.1 mmol, 2.4 eq). Triethylamine (2 mL, 14.2 mmol) was added and the mixture was heated under reflux for 3 days. After allowing the solution to cool to room temperature, the solvent was evaporated and the remaining semi-solid residue was triturated with ice-cold Et<sub>2</sub>O (200 mL). The insoluble solid was filtered and washed with further ice-cold Et<sub>2</sub>O (200 mL) and allowed to dry in air to afford the ligand **7b** as a yellow solid (0.28 g, 30 %); Mp (130-133°C); <sup>1</sup>H NMR (CDCl<sub>3</sub>) δ<sub>H</sub> = 0.93 (m, 12H), 1.44 (m, 16H), 1.90 (m, 8H), 3.09 (m, 8H), 8.30 (s, 1H), 8.39 (d, *J* = 8.4 Hz, 1H), 8.88 (d, *J* = 8.6 Hz, 1H), 8.93 (d, *J* = 8.4 Hz, 1H),

9.01 (d,  $J = 8.6$  Hz, 1H) ;  $^{13}\text{C}$  NMR ( $\text{CDCl}_3$ )  $\delta_{\text{C}} = 14, 14.1, 22.5, 22.5, 28.1, 28.3, 31.7, 32.1, 32.5, 34.3, 122.0, 123.7, 123.8, 129.0, 129.8, 130.6, 136.3, 137.3, 146.0, 146.9, 154.0, 154.2, 160.1, 160.3, 161.1, 161.3, 162.6$ ;  $\text{C}_{38}\text{H}_{49}\text{N}_8\text{Br}$   $[\text{MH}]^+$  requires  $m/z$  697.3336 and 699.3316; (FTMS + p ESI) MS found  $m/z$  697.3335 and 699.3315; IR  $\nu_{\text{max}} / \text{cm}^{-1} = 3513, 3468, 2959, 2927, 2860, 1604, 1515, 1488, 1466, 1439$ .

### 5,6-Dibromo-2,9-dimethyl-1,10-phenanthroline (3)

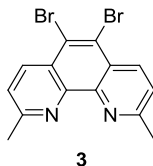

Fuming sulfuric acid (110 mL) was added to **1** (13.12 g, 63 mmol). Bromine (6.5 mL, 252.4 mmol, 4 eq) was added and the mixture was heated under reflux for 3 days. The flask was allowed to cool to room temperature and the solution was quenched with water (500 mL). NaOH pellets were added until the pH of the solution was between 7-8. The resulting mixture was extracted with chloroform (10×100 mL) and the combined organic phases were dried over  $\text{MgSO}_4$ , filtered and the solvent removed under vacuum to afford the product **3** as a yellow solid (21.63 g, 94 %); Mp (163-166°C);  $^1\text{H}$ -NMR ( $\text{CDCl}_3$ ):  $\delta_{\text{H}} = 3.00$  (s, 6H), 7.57 (d,  $J = 8.5$  Hz, 2H), 8.64 (d,  $J = 8.5$  Hz, 2H);  $^{13}\text{C}$  NMR ( $\text{CDCl}_3$ )  $\delta_{\text{C}} = 25.7, 124.9, 126.9, 137.4, 145, 160.6$ ;  $\text{C}_{14}\text{H}_{10}\text{N}_2\text{Br}_2$   $[\text{MH}]^+$  requires  $m/z$  364.9284, 366.9263 and 368.9243; (FTMS + p ESI) MS found  $m/z$  364.9279, 366.9255 and 368.9233; IR  $\nu_{\text{max}} / \text{cm}^{-1} = 3513, 3410, 1586, 1483, 1434, 1358, 1300, 1201, 1148, 1099$ .

### 5,6-Dibromo-1,10-phenanthroline-2,9-dicarbaldehyde (4c)

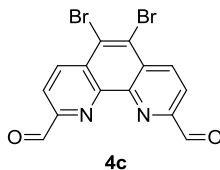

Selenium dioxide (8.64 g, 77.9 mmol, 2.1 eq) dissolved in 1,4-dioxane (250 mL) and water (~ 8 mL) was heated to reflux. To this solution was added a **3** (13.45 g, 36.8 mmol) in dioxane (250 mL) dropwise over 15 min. The solution was heated under reflux for 5 h. After allowing the solution to cool to room temperature, the precipitated selenium metal was filtered off. The

filtrate was left to crystallise overnight and then filtered and washed with Et<sub>2</sub>O (200 mL) and allowed to dry in a vacuum oven (40 °C) to afford the product **4c** as yellow solid (9.33 g, 64 %); Mp (209-213°C); <sup>1</sup>H-NMR (CDCl<sub>3</sub>): δ<sub>H</sub> = 8.40 (d, *J* = 8.5 Hz, 2H), 9.08 (d, *J* = 8.5 Hz, 2H), 10.57 (s, 2H, 2×CHO); <sup>13</sup>C NMR (CDCl<sub>3</sub>) δ<sub>C</sub> = 121.7, 127.4, 130.5, 139.1, 144.6, 152.4, 193; C<sub>14</sub>H<sub>6</sub>N<sub>2</sub>O<sub>2</sub>Br<sub>2</sub> [MH]<sup>+</sup> requires *m/z* 392.8869 and 394.8848; (FTMS + p ESI) MS found *m/z* 392.8873 and 394.8853; IR *v*<sub>max</sub> / cm<sup>-1</sup> = 3656, 3080, 2865, 1708, 1245.

### 5,6-Dibromo-1,10-phenanthroline-2,9-dicarbonitrile (**5c**)

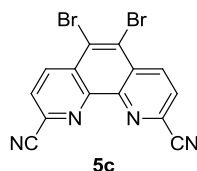

To a suspension of **4c** (4.50 g, 11.4 mmol) in dry MeCN (350 mL) was added hydroxylamine hydrochloride (1.75 g, 26 mmol, 2.3 eq) and Et<sub>3</sub>N (11 mL, 78.3 mmol, 6.9 eq). The solution was heated under reflux for 24 hours. After allowing the mixture to cool to room temperature, *p*-toluenesulfonyl chloride (7.34 g, 38.5 mmol, 3.4 eq) and pyridine (2.8 mL, 34.76 mmol, 3 eq) were added and the mixture was heated under reflux for 2 days. The mixture was filtered while hot and the solid residue was washed with hot MeCN (20 mL). The filtrate was evaporated to afford a dark brown semi-solid which was triturated with MeOH (100 mL) and then filtered and washed with MeOH (100 mL) and Et<sub>2</sub>O (100 mL) to afford the product **5c** as a pale brown solid (2.59 g, 58 %); Mp (135-138°C); <sup>1</sup>H NMR (DMSO-*d*<sub>6</sub>) δ<sub>H</sub> = 8.38 (d, *J* = 8.5 Hz, 2H), 8.88 (d, *J* = 8.5 Hz, 2H); <sup>13</sup>C NMR (DMSO-*d*<sub>6</sub>) δ<sub>C</sub> = 117, 125.4, 128, 129.1, 133.6, 139.2, 144.1; C<sub>14</sub>H<sub>4</sub>N<sub>4</sub>Br<sub>2</sub> [MH]<sup>+</sup> requires *m/z* 386.8883; (FTMS + p ESI) MS found *m/z* 386.8886; IR *v*<sub>max</sub> / cm<sup>-1</sup> = 3260, 3083, 2944, 2608, 2241, 1758, 1700, 1571, 1472, 1361, 1209.

### 5,6-Dibromo-1,10-phenanthroline-2,9-dicarbohydrazonamide (**6c**)

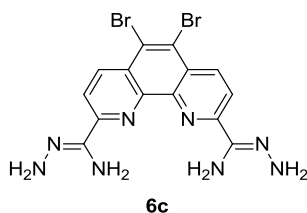

To a suspension of **5c** (2.59 g, 6.7 mmol) in EtOH (150 mL) was added hydrazine hydrate (100 mL, 64%). The suspension was stirred at room temperature for 7 days. Et<sub>2</sub>O (200 mL) and EtOH (200 mL) were added and the solid was filtered and washed with Et<sub>2</sub>O (200 mL) and allowed to dry in a vacuum oven (40 °C) to afford the product **6c** as a yellow solid (2.83 g, 94 %); Mp (335-338°C); <sup>1</sup>H NMR (DMSO-*d*<sub>6</sub>) δ<sub>H</sub> = 5.80 (br s, 4H, NH<sub>2</sub>), 6.11 (br s, 4H, NH<sub>2</sub>), 8.37 (d, *J* = 8.9 Hz, 2H), 8.62 (d, *J* = 8.5 Hz, 2H); <sup>13</sup>C NMR (DMSO-*d*<sub>6</sub>) δ<sub>C</sub> = 120.9, 123.7, 127.5, 136.4, 142.7, 143.4, 152.1; C<sub>14</sub>H<sub>12</sub>N<sub>8</sub>Br<sub>2</sub> [M + Na] requires *m/z* 472.9444 and 474.9423; (FTMS + c ESI) MS found *m/z* 472.9450 and 474.9430; IR ν<sub>max</sub> / cm<sup>-1</sup> = 3459, 3353, 3190, 1642, 1591, 1490, 1358, 1198.

### 5,6-Dibromo-2,9-bis(5,6-dipentyl-1,2,4-triazin-3-yl)-1,10-phenanthroline (**7c**)

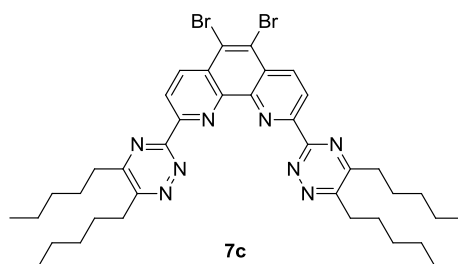

To a suspension of **6c** (0.50 g, 1.1 mmol) in 1,4-dioxane (50 mL) was added dodecane-6,7-dione (0.52 g, 2.6 mmol, 2.4 eq). Triethylamine (2 mL, 14.2 mmol) was added and the mixture was heated under reflux for 3 days. After allowing the solution to cool to room temperature, the solvent was evaporated and the remaining semi-solid residue was triturated with ice-cold Et<sub>2</sub>O (100 mL). The insoluble solid was filtered and washed with further ice-cold Et<sub>2</sub>O (100 mL) and allowed to dry in air to afford the ligand **7c** as a yellow solid (0.09 g, 11 %); Mp (132-135°C); <sup>1</sup>H NMR (CDCl<sub>3</sub>) δ<sub>H</sub> = 0.94 (m, 12H), 1.45 (m, 16H), 1.90 (m, 8H), 3.07 (t, *J* = 8.7 Hz, 4H), 3.13 (t, *J* = 8.7 Hz, 4H), 9.04 (s, 4H, 3-H); <sup>13</sup>C NMR (CDCl<sub>3</sub>) δ<sub>C</sub> = 14, 14.1, 22.5, 22.5, 28.1, 28.3, 31.6, 32.1, 32.5, 34.4, 124.4, 126.3, 129.6, 138.5, 146, 154.6, 160.3, 161.6, 162.5; C<sub>76</sub>H<sub>96</sub>N<sub>16</sub>Br<sub>2</sub><sup>81</sup>Br<sub>2</sub> [2M + Na] requires *m/z* 1575.4589; (FTMS + c ESI) MS found *m/z* 1575.4639; IR ν<sub>max</sub> / cm<sup>-1</sup> = 3512, 3458, 2957, 2925, 2858, 2163, 1628, 1588, 1519, 1479, 1459, 1442.



## $^1\text{H}$ and $^{13}\text{C}$ NMR spectra for ligands

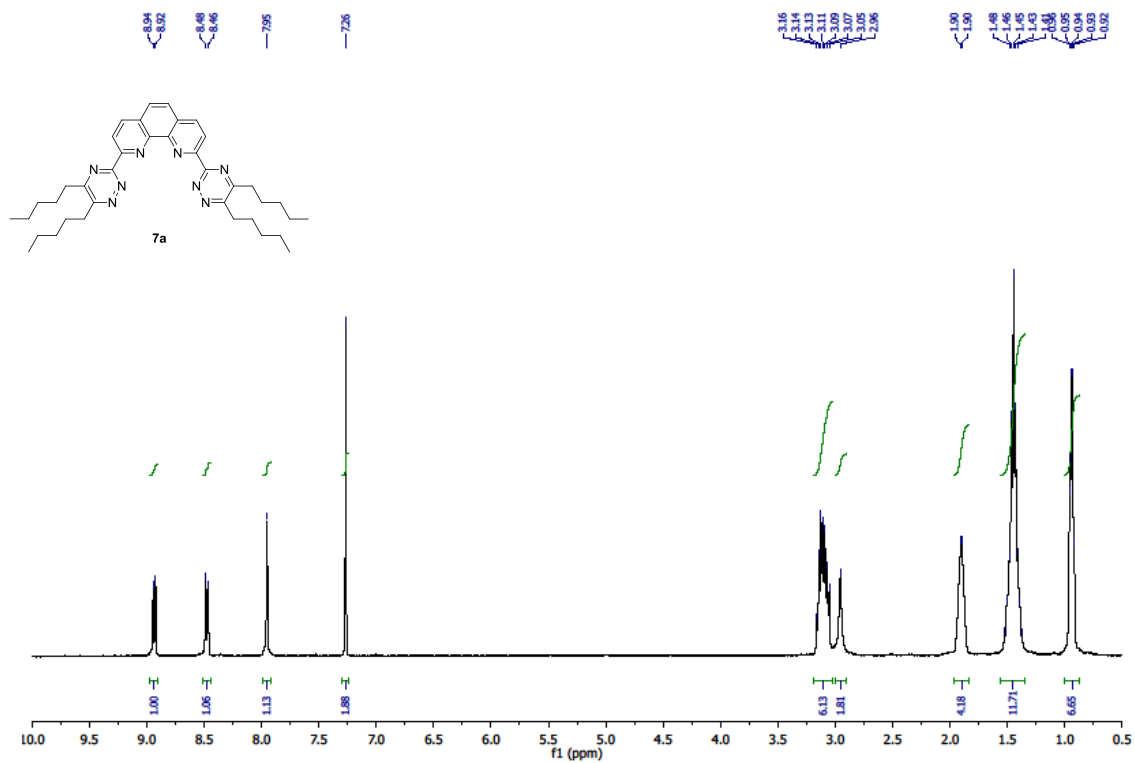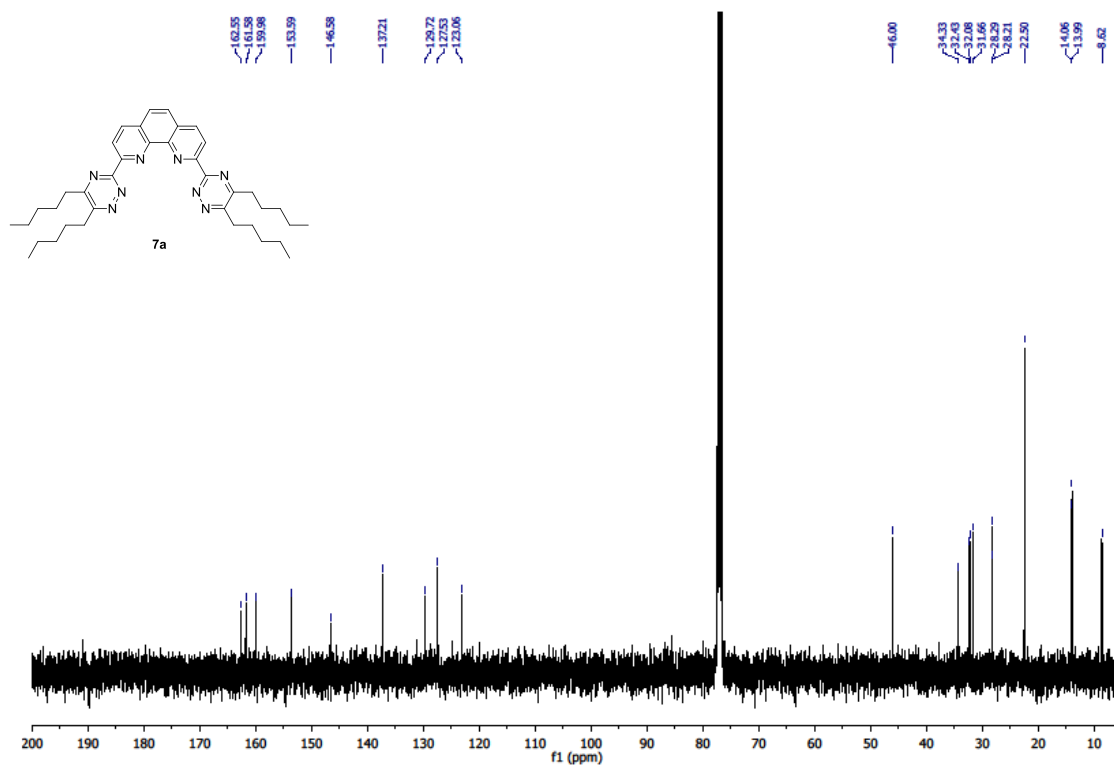

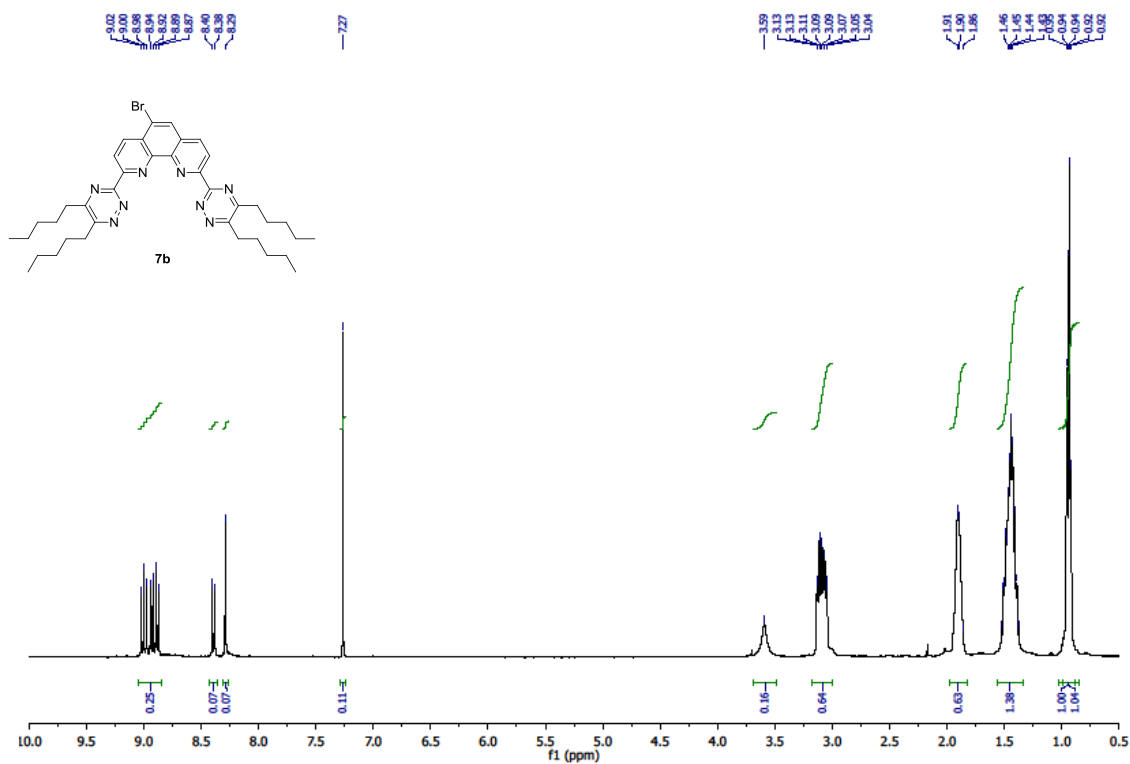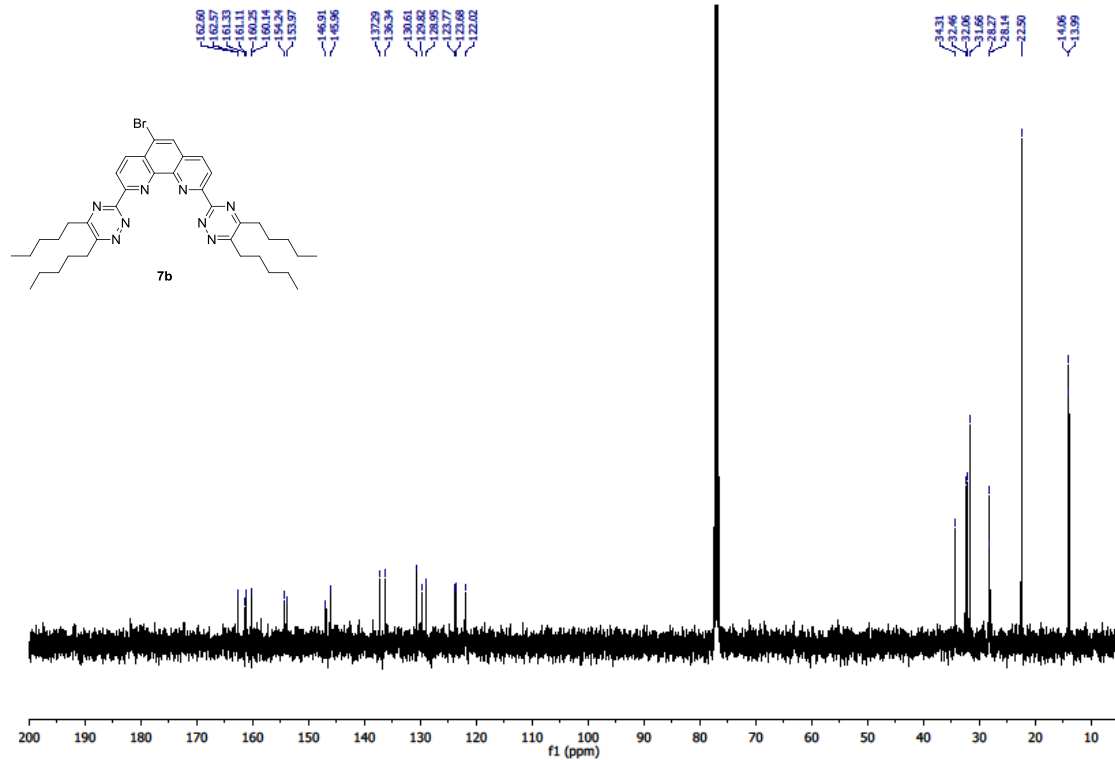

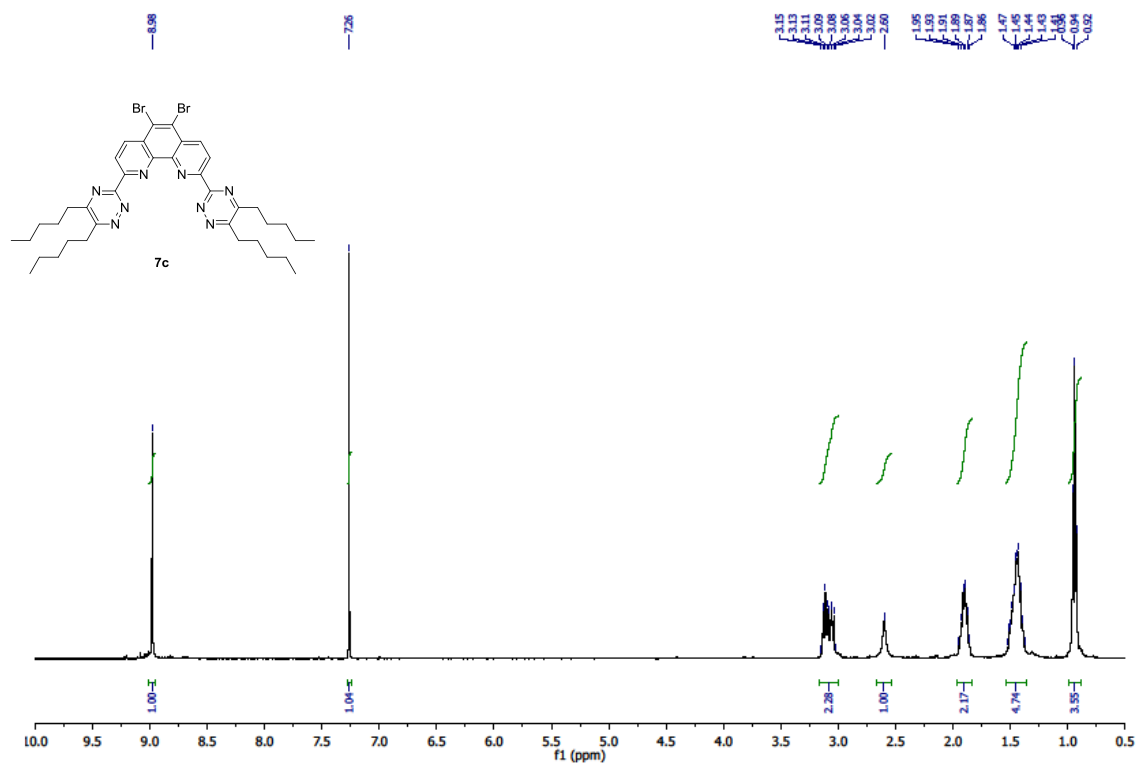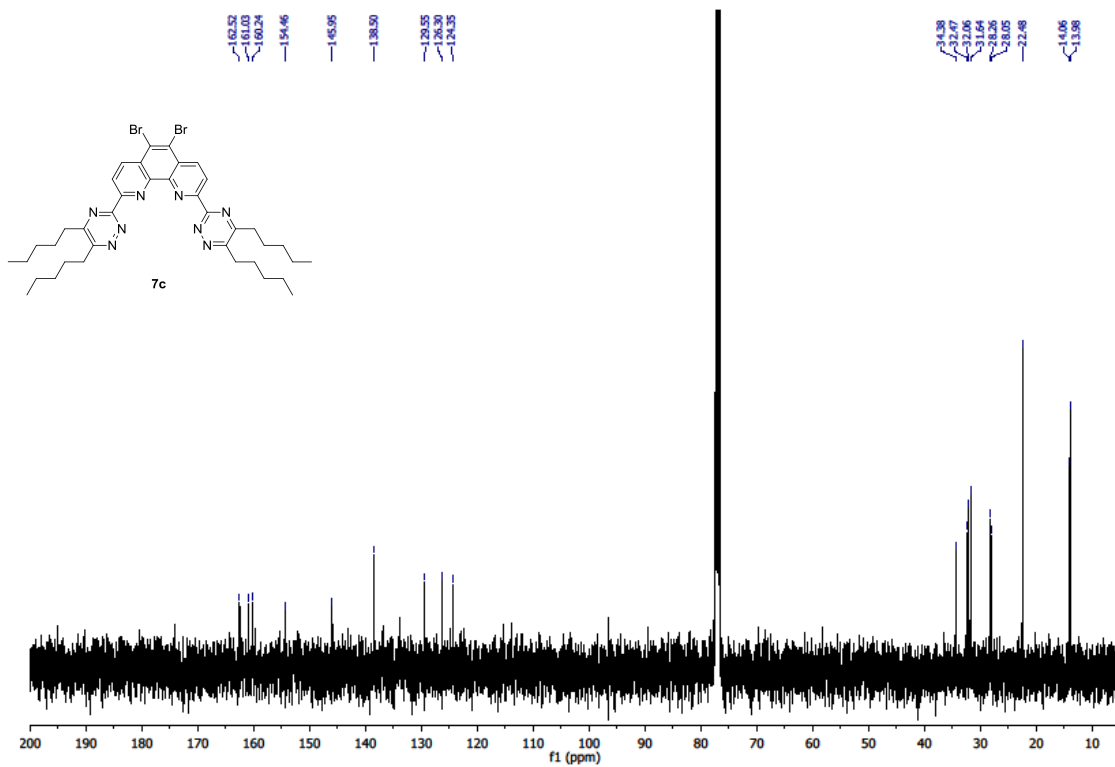

## 2.0 NMR Spectroscopic Titrations with Lanthanide Salts

### General Procedure

A 0.5 mL, 0.01 M solution of C5-BTPhen (**7a**, 5  $\mu\text{mol}$ ) in  $\text{CD}_3\text{CN}$  was made up in an NMR tube. A 0.01 M solution of  $\text{Ln}(\text{NO}_3)_3 \cdot x\text{H}_2\text{O}$  was added in 25-50  $\mu\text{L}$  aliquots (0.25-0.5  $\mu\text{mol}$  per aliquot) and the  $^1\text{H}$  NMR spectrum was recorded after each addition.

**C5-BTPhen:**  $\delta_{\text{H}}$  ( $\text{CD}_3\text{CN}$ ) = 0.94 (t,  $J = 6.9$  Hz, 6H), 0.95 (t,  $J = 6.9$  Hz, 6H), 1.46 (m, 16H), 1.96 (quint,  $J = 4.9$  Hz, 8H), 3.00 (t,  $J = 7.3$  Hz, 4H), 3.10 (t,  $J = 7.3$  Hz, 4H), 8.09 (s, 2H), 8.62 (d,  $J = 8.4$  Hz), 8.81 (d,  $J = 8.4$  Hz, 2H) ppm.

**La(C5-BTPhen) $_2$ (NO $_3$ ) $_x$ :**  $\delta_{\text{H}}$  ( $\text{CD}_3\text{CN}$ ) = 0.62 (quint,  $J = 7.4$  Hz, 4H), 0.70 (t,  $J = 7.2$  Hz, 6H), 0.80 (quint,  $J = 7.4$  Hz, 4H), 0.89 (t,  $J = 7.2$  Hz, 6H), 0.93 (quint,  $J = 7.4$  Hz, 4H), 1.33 (m, 8H), 1.76 (quint,  $J = 7.4$  Hz, 4H), 2.39 (t,  $J = 7.3$  Hz, 4H), 2.74 (t,  $J = 7.3$  Hz, 4H), 8.49 (s, 2H), 9.04 (d,  $J = 8.4$  Hz, 2H), 9.11 (d,  $J = 8.4$  Hz, 2H) ppm.

**Ln(C5-BTPhen) $_2$ (NO $_3$ ) $_x$ :**  $\delta_{\text{H}}$  ( $\text{CD}_3\text{CN}$ ) = 0.52 (quint,  $J = 7.4$  Hz, 4H), 0.79 (t,  $J = 7.2$  Hz, 6H), 0.80-0.87 (m, 10H), 1.06 (quint,  $J = 7.4$  Hz, 4H), 1.30 (m, 8H), 1.69 (quint,  $J = 7.4$  Hz, 4H), 2.28 (t,  $J = 7.3$  Hz, 4H), 2.72 (t,  $J = 7.3$  Hz, 4H), 8.55 (s, 2H), 8.96 (d,  $J = 8.4$  Hz, 2H), 9.15 (d,  $J = 8.4$  Hz, 2H) ppm.

## 3.0 Solvent Extraction Properties

### General Procedure

500  $\mu\text{L}$  of solutions of BTPhen (10 mmol/L) in 1-octanol and 500  $\mu\text{L}$  of solutions of  $^{241}\text{Am}(\text{III}) + ^{152}\text{Eu}(\text{III})$  (1 kBq/mL each) in nitric acid of varied concentrations were shaken for 90 minutes on an orbital shaker at 2500/min in 2 mL glass screw-cap vials at  $T = 20$   $^\circ\text{C}$ . Phases were separated by centrifugation, and 300  $\mu\text{L}$  of each organic and aqueous phase were taken for analysis on a gamma counter (Packard Cobra Auto Gamma 5003).

Distribution ratios  $D_{\text{M}}$  were determined from the gamma count rates of both samples,

$$D_{\text{M}} = [M]_{\text{org}} / [M]_{\text{aq}} = (\text{cpm}_{\text{org}} * V_{\text{aq}}) / (\text{cpm}_{\text{aq}} * V_{\text{org}})$$

The separation factor is

$$SF_{\text{Am/Eu}} = D_{\text{Am}} / D_{\text{Eu}}$$

### Extraction of Am(III) and Eu(III) into octanol

**Table 1.** Extraction of Am(III) and Eu(III) into octanol by C5-BTPPhen **7a** (0.01 M) as a function of nitric acid concentration

| [HNO <sub>3</sub> ] Initial (mol/L) | D <sub>Am</sub> | D <sub>Eu</sub> | SF <sub>Am/Eu</sub> |
|-------------------------------------|-----------------|-----------------|---------------------|
| 0.1                                 | 66              | 0.851           | 77.6                |
| 0.2                                 | 72.7            | 1.11            | 65.8                |
| 0.5                                 | 69.4            | 0.914           | 75.9                |
| 0.7                                 | 70.7            | 1.12            | 63                  |
| 1                                   | 68.4            | 1.01            | 67.6                |
| 1.5                                 | 127             | 0.831           | 153                 |
| 2                                   | 115             | 0.728           | 158                 |
| 3                                   | 121             | 0.656           | 184                 |
| 4                                   | 101             | 0.567           | 178                 |

**Table 2.** Extraction of Am(III) and Eu(III) into octanol by BrC5-BTPPhen **7b** (0.01 M) as a function of nitric acid concentration

| [HNO <sub>3</sub> ] Initial (mol/L) | D <sub>Am</sub> | D <sub>Eu</sub> | SF <sub>Am/Eu</sub> |
|-------------------------------------|-----------------|-----------------|---------------------|
| 0.1                                 | 25.1            | 0.134           | 187                 |
| 0.2                                 | 63.4            | 0.257           | 247                 |
| 0.5                                 | 102             | 0.479           | 212                 |
| 0.7                                 | 98.7            | 0.537           | 184                 |
| 1                                   | 99.6            | 0.551           | 181                 |
| 1.5                                 | 104             | 0.520           | 199                 |
| 2                                   | 93.6            | 0.526           | 178                 |
| 3                                   | 96.9            | 0.466           | 208                 |
| 4                                   | 108             | 0.434           | 250                 |

**Table 3.** Extraction of Am(III) and Eu(III) into octanol by Br<sub>2</sub>C5-BTPhen **7c** (0.01 M) as a function of nitric acid concentration

| [HNO <sub>3</sub> ] Initial (mol/L) | D <sub>Am</sub> | D <sub>Eu</sub> | SF <sub>Am/Eu</sub> |
|-------------------------------------|-----------------|-----------------|---------------------|
| 0.1                                 | 1.01            | 0.00892         | 114                 |
| 0.2                                 | 8.52            | 0.0488          | 175                 |
| 0.5                                 | 9.76            | 0.0926          | 105                 |
| 0.7                                 | 23.5            | 0.131           | 179                 |
| 1                                   | 57.4            | 0.143           | 401                 |
| 1.5                                 | 87.5            | 0.152           | 574                 |
| 2                                   | 75.2            | 0.144           | 522                 |
| 3                                   | 86.7            | 0.131           | 660                 |
| 4                                   | 99.1            | 0.130           | 763                 |
